# Supplementary material
Source: Springer Nature journal article supplement (https://www.springermedizin.de/resource/supplementary/12963_2013_224_MOESM2_ESM.pdf/9572390)

*HCV-related deaths*

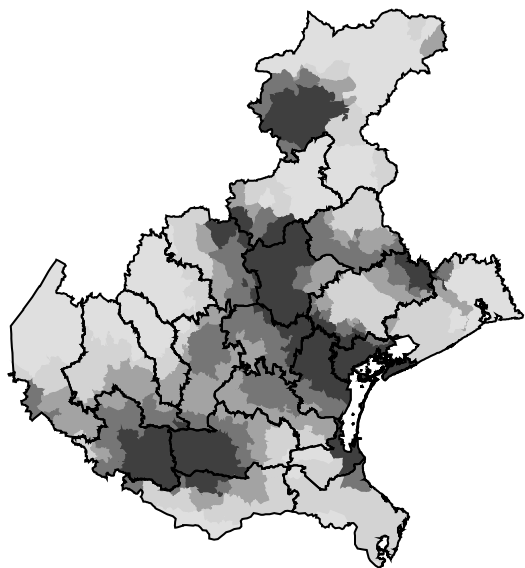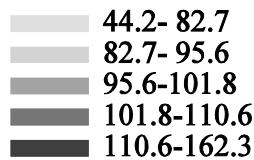

*Alcohol-related deaths*

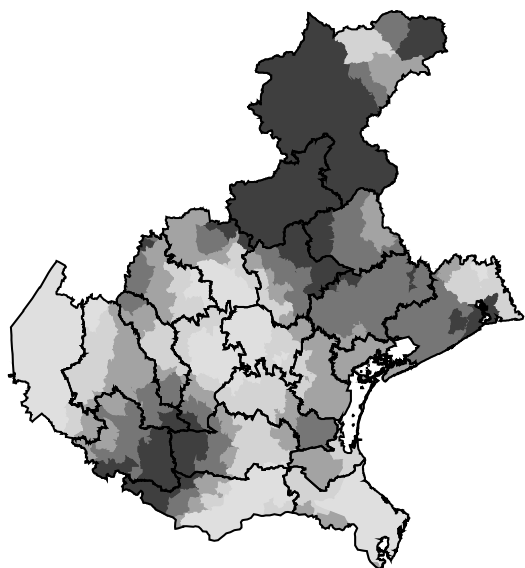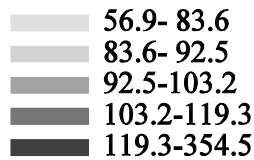

Supplement: MOESM2 [file 9572390]
